# Supplementary figures and images for: Multiple, Independent T Cell Lymphomas Arising in an Experimentally FIV-Infected Cat during the Terminal Stage of Infection
Source: MDPI journal article supplement (doi:10.3390/v10060280), 2018-05-24

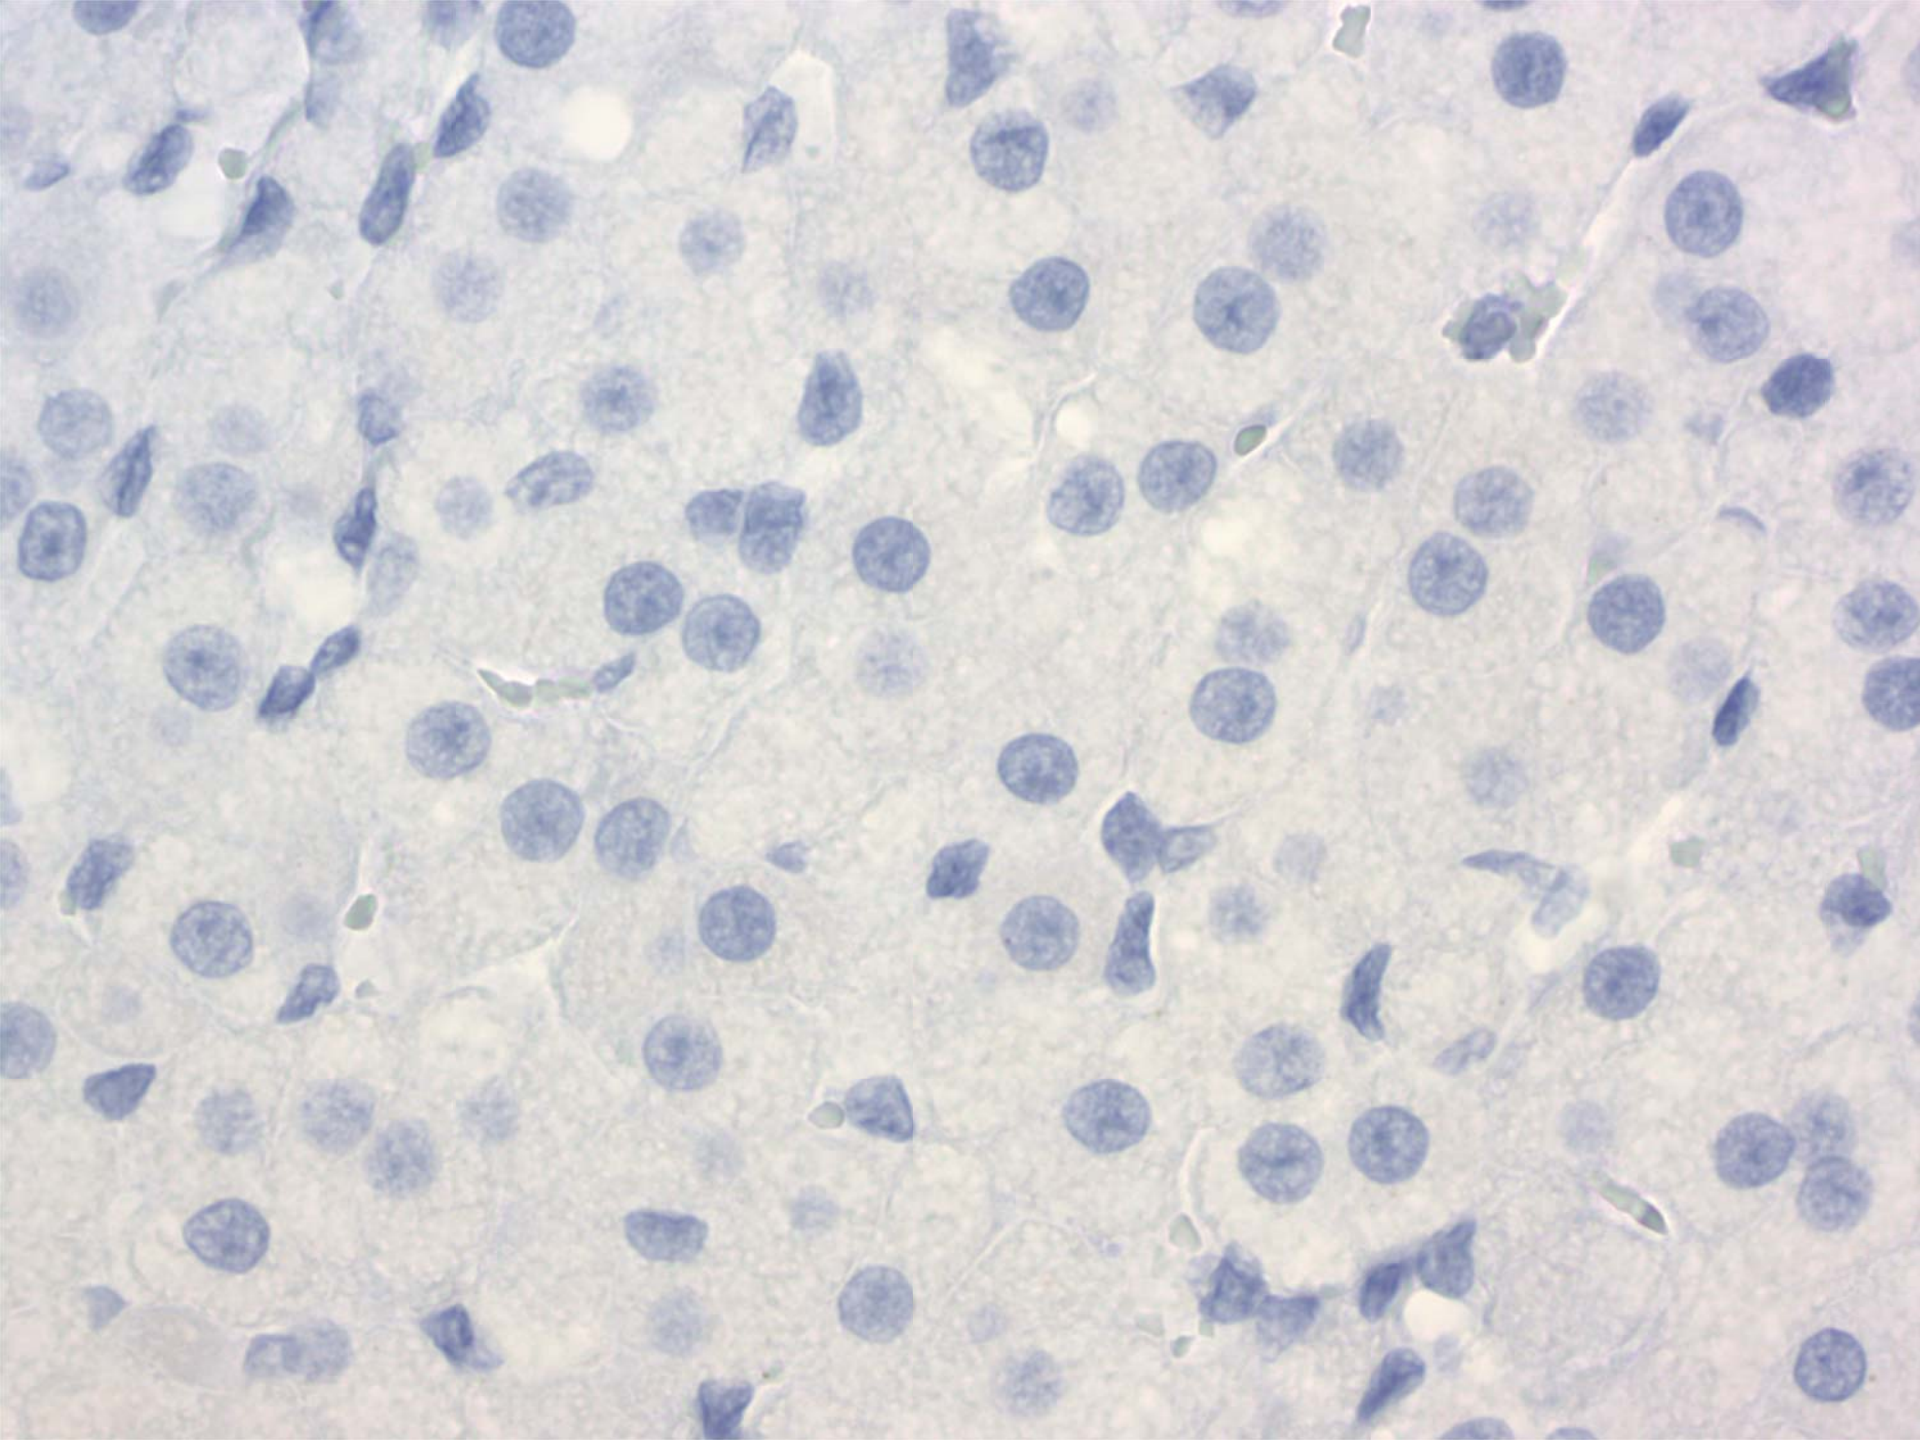

Supplement: s1 [file s1]

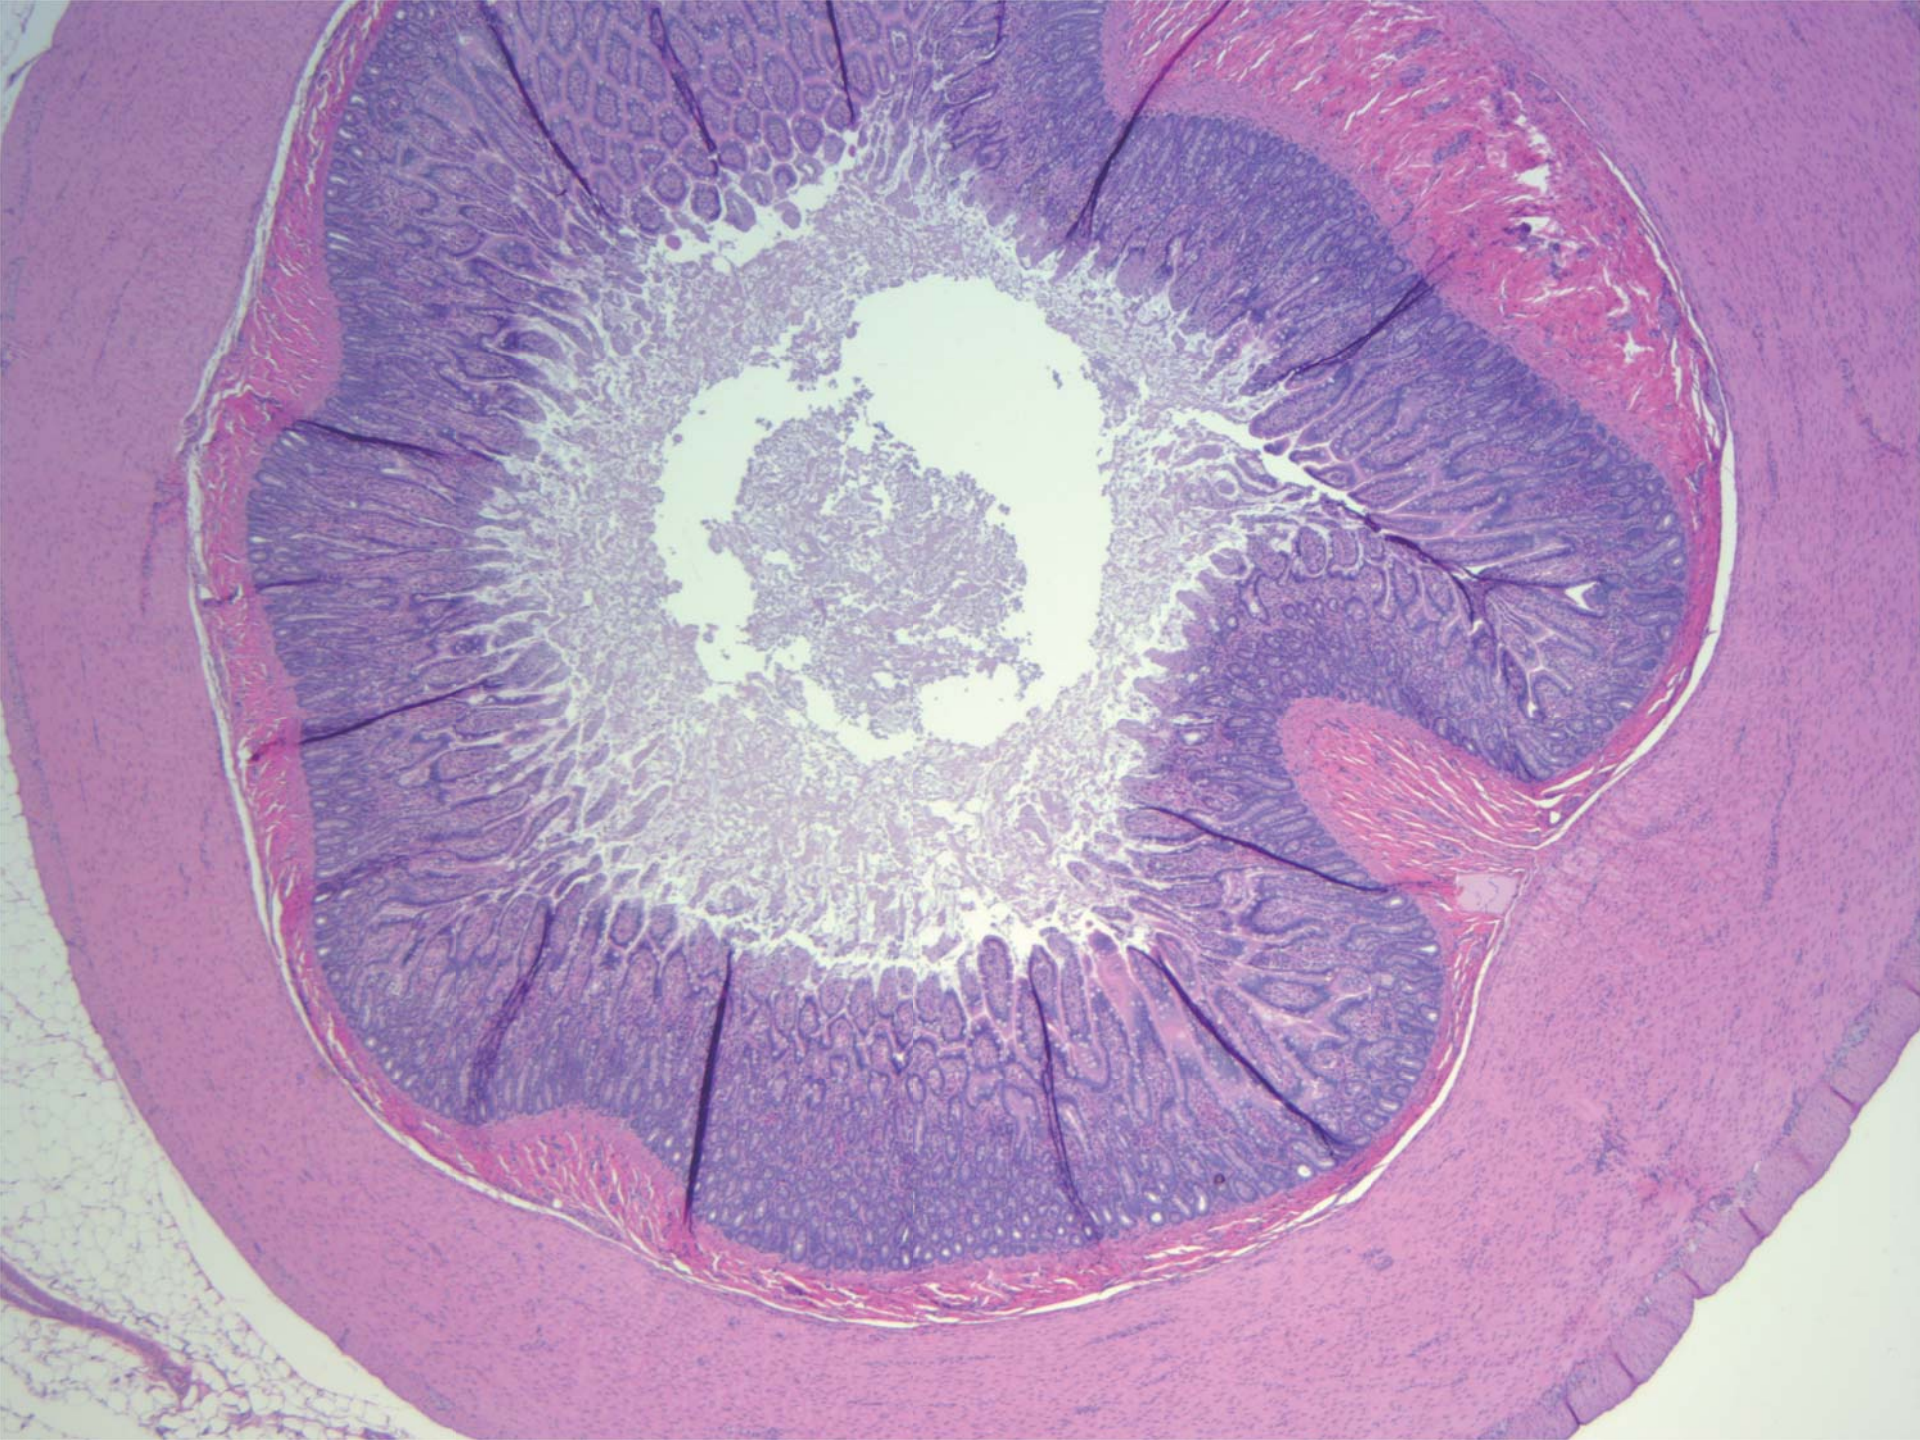

Supplement: s1 [file s1]

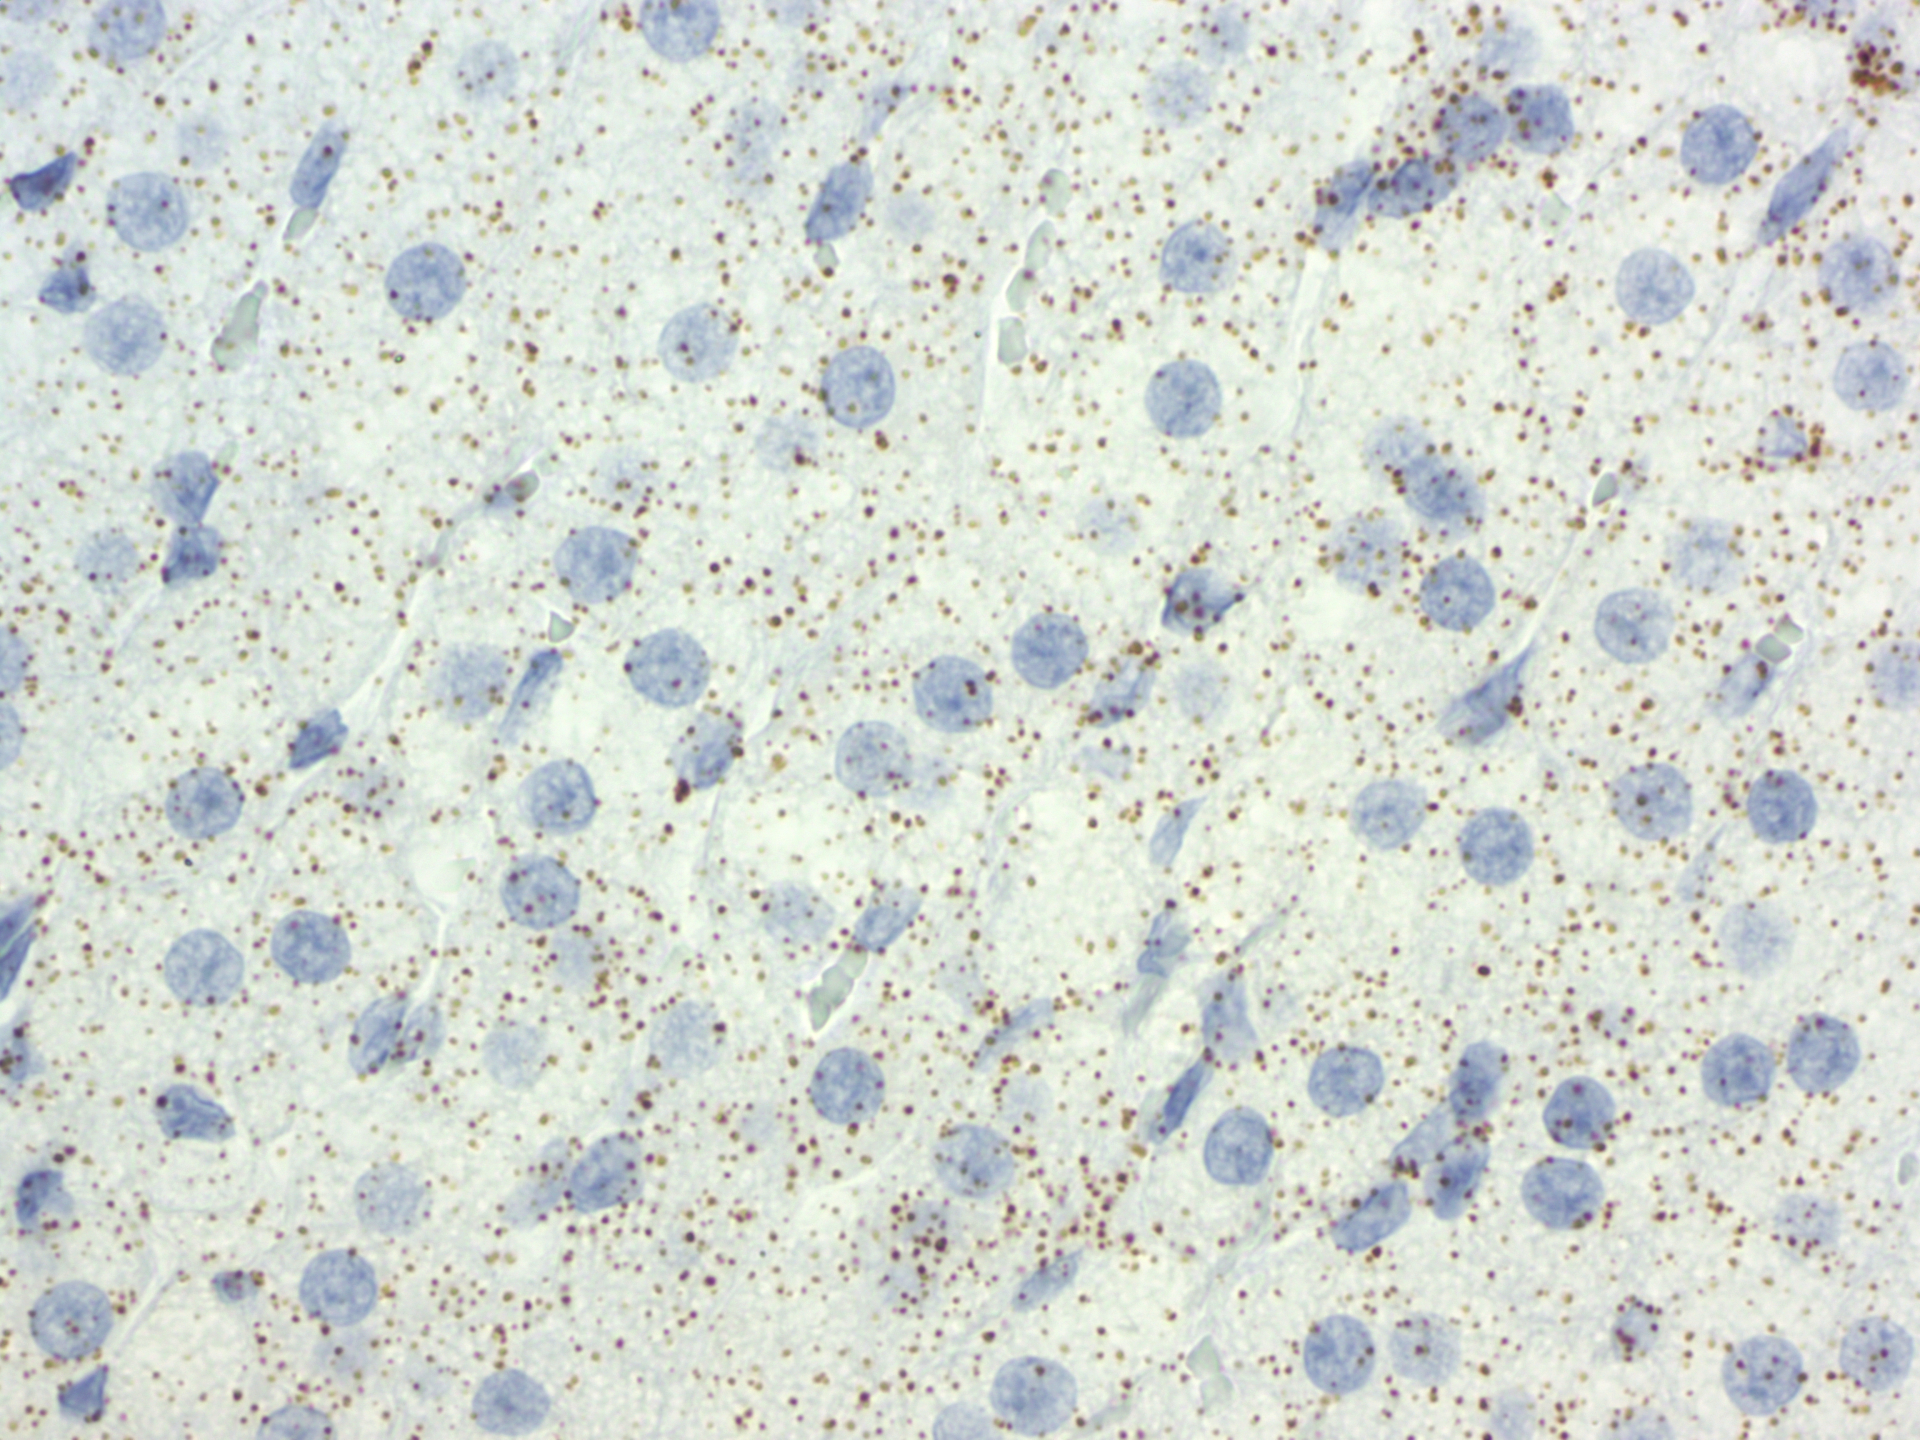

Supplement: s1 [file s1]

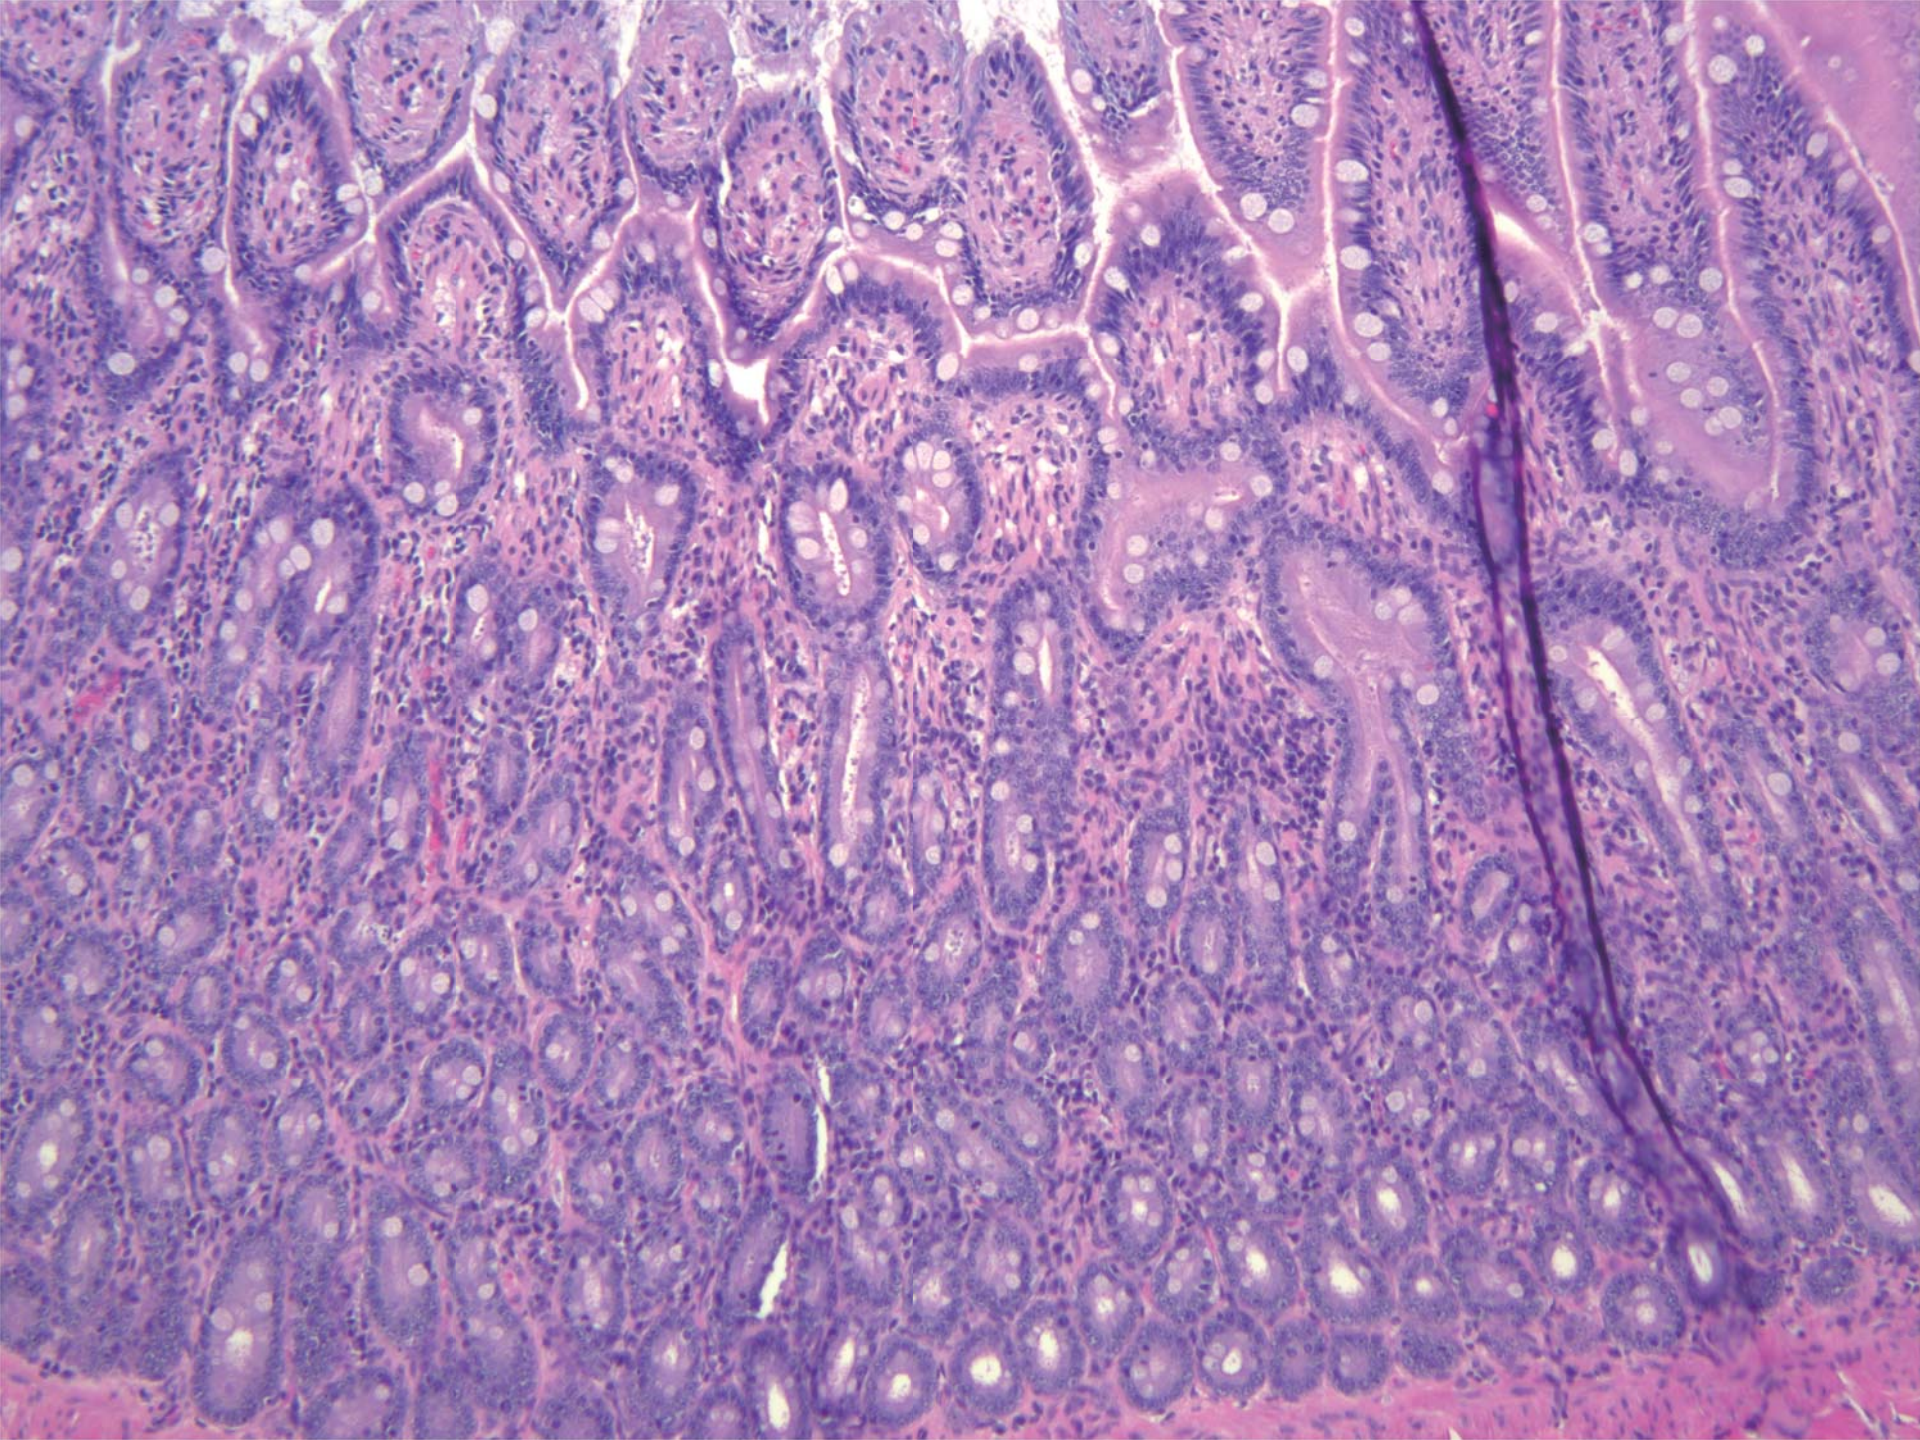

Supplement: s1 [file s1]
